# Supplementary material for: Aqueous phase one-pot green synthesis of SnSe nanosheets in a protein matrix: negligible cytotoxicity and room temperature emission in the visible region
Source: Royal Society of Chemistry journal article supplement (doi:10.1039/c5ra09448h), 2015-01-01
Supplement: c5ra09448h1.pdf [file c5ra09448h1.pdf]

**Aqueous phase one-pot green synthesis of SnSe nanosheets in protein matrix: negligible cytotoxicity and room temperature emission in the visible region**

Laboni Das, Apurav Guleria and Soumyakanti Adhikari\*

Radiation & Photochemistry Division, Bhabha Atomic Research Centre, Mumbai 400 085, India

**Supplementary information**

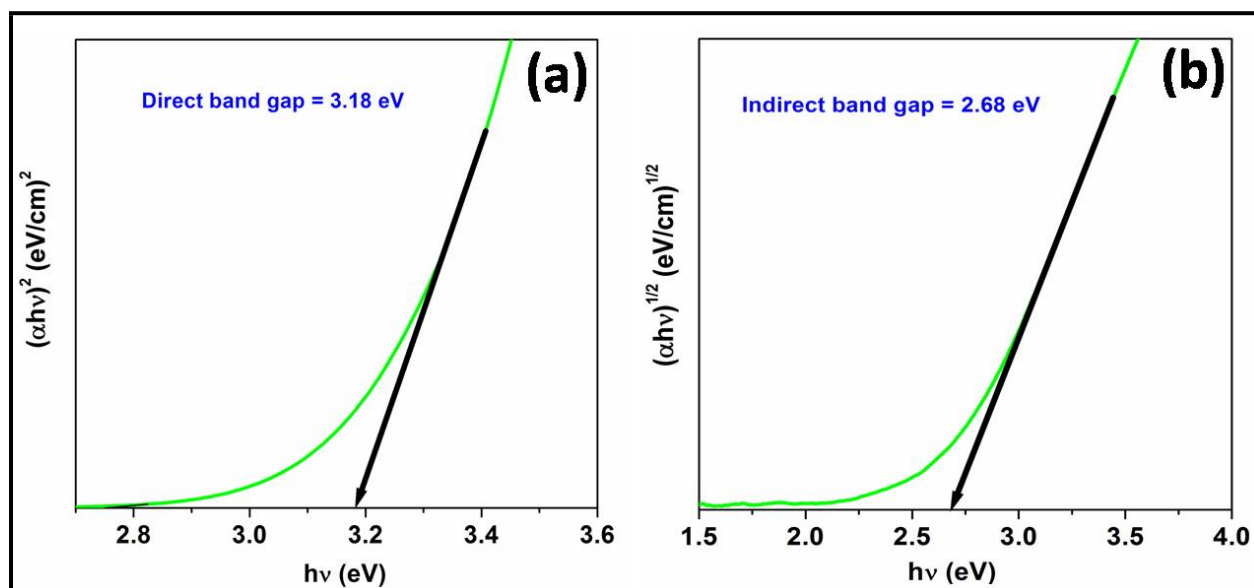

**Fig.S1.**Tauc plot for determining the (a) direct band gap and (b) indirect band gap energy values of tin selenide nanoparticles.

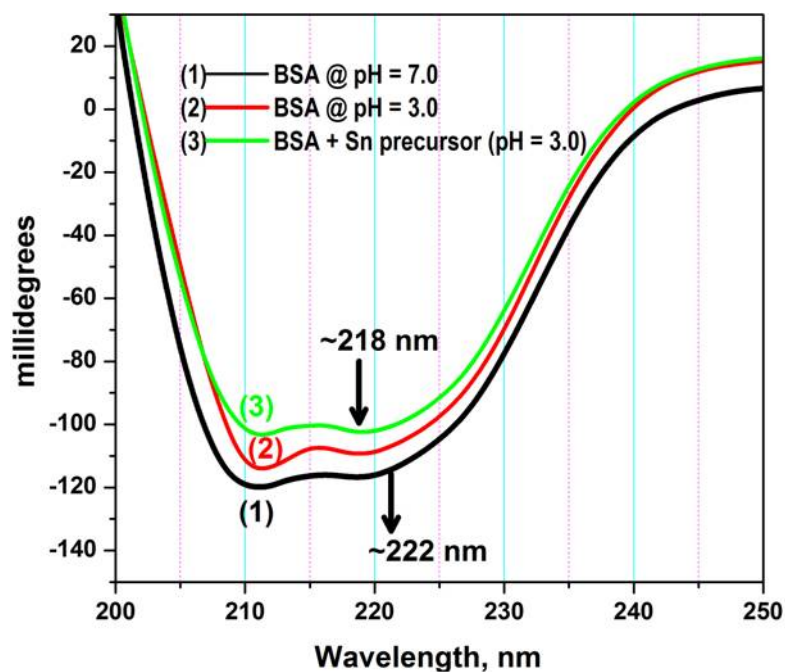

**Fig.S2.** CD spectra of solutions: BSA @ pH = 7.0 (1), BSA @ pH = 3.0 (2), BSA + precursor solution of Sn (3).

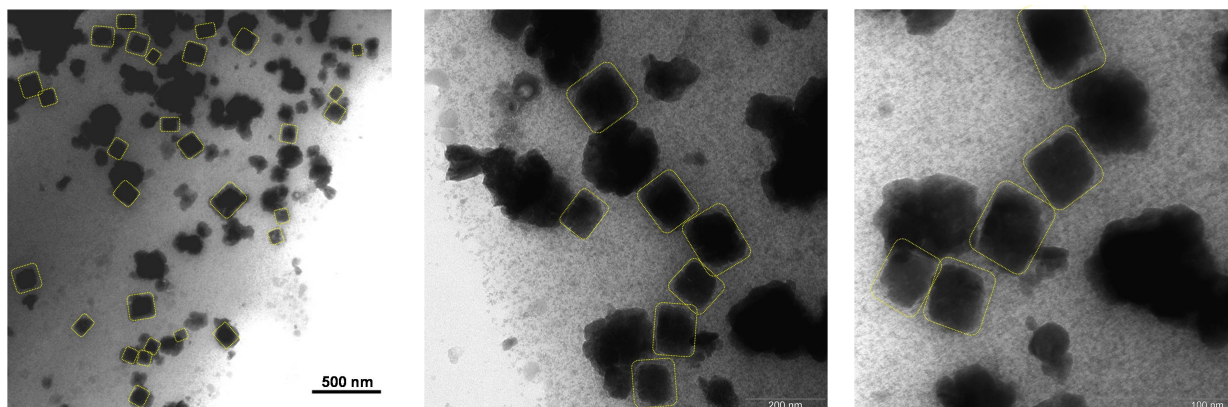

**Fig.S3.** TEM images recored at different magnification and grid areas showing the formation of sheet-like nanostructures of SnSe.

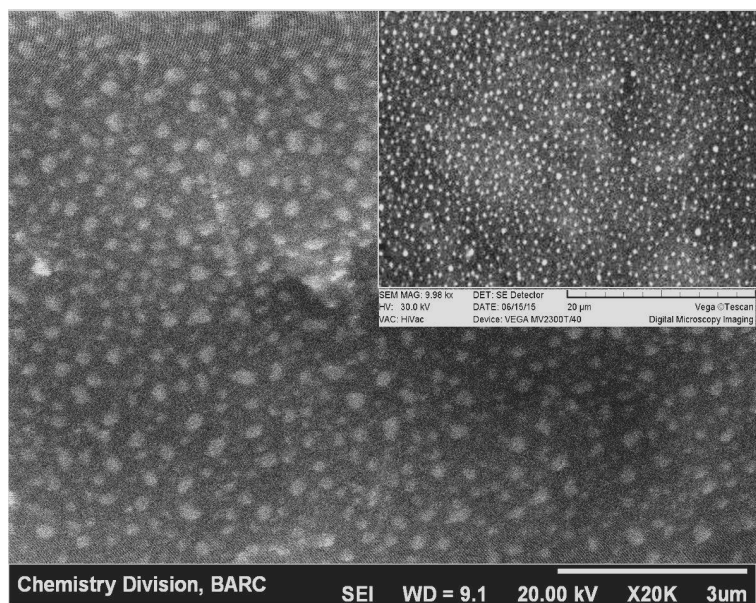

**Fig.S4.** SEM image showing the formation of sheet-like nanostructures of SnSe. Inset: SEM image at lower magnification (*scale bar: 20  $\mu\text{m}$* )
